# Supplementary material
Source: PubMed Central journal article supplement (PMC4054176)
Supplement: JB.00051-14_zjb999093192so1.pdf [file JB.00051-14_zjb999093192so1.pdf]

Supplemental Table 1. Genes differentially regulated during biofilm maturation

| ATCC12228 <sup>1</sup> | RP62A <sup>2</sup> | Gene         | Fold Change <sup>3</sup> | Direction <sup>4</sup> | Description                                                                 |
|------------------------|--------------------|--------------|--------------------------|------------------------|-----------------------------------------------------------------------------|
| <b>SE0103</b>          |                    | <i>arcB</i>  | 11.0                     | ↑                      | Ornithine carbamoyltransferase                                              |
| <b>SE0104</b>          |                    | <i>arcR</i>  | 4.9                      | ↑                      | Transcriptional regulator Crp/Fnr family                                    |
| <b>SE0105</b>          |                    | <i>arcD</i>  | 3.2                      | ↑                      | Arginine/ornithine transporter                                              |
| <b>SE0106</b>          |                    | <i>arcA</i>  | 2.5                      | ↑                      | Arginine deiminase                                                          |
| SE0146                 | SERP2421           |              | 2.1                      | ↑                      | Putative mechanosensitive ion channel                                       |
| SE0154                 | SERP2414           |              | 2.8                      | ↑                      | Putative lipoprotein                                                        |
| <b>SE0182</b>          | <b>SERP2393</b>    |              | 4.0                      | ↑                      | 6-carboxyhexanoate - COA ligase (EC 6.2.1.4)                                |
| <b>SE0183</b>          | <b>SERP2391</b>    | <i>sspC</i>  | 6.0                      | ↑                      | Staphostatin                                                                |
| <b>SE0184</b>          | <b>SERP2390</b>    | <i>sspB</i>  | 4.6                      | ↑                      | Staphopain cysteine protease                                                |
| <b>SE0206</b>          | <b>SERP2371</b>    | <i>opp1B</i> |                          | ↑                      | Oligopeptide permease                                                       |
| <b>SE0208</b>          | <b>SERP2370</b>    | <i>opp1C</i> |                          | ↑                      | Oligopeptide permease                                                       |
| <b>SE0209</b>          | <b>SERP2369</b>    | <i>opp1D</i> |                          | ↑                      | Oligopeptide permease                                                       |
| <b>SE0210</b>          | <b>SERP2368</b>    | <i>opp1F</i> |                          | ↑                      | Oligopeptide permease                                                       |
| SE0211                 | SERP2367           |              | 2.5                      | ↑                      | Putative transport protein                                                  |
| SE0216                 | SERP2364           |              | 3.0                      | ↑                      | Succinyl-diaminopimelate desuccinylase (EC 3.5.1.8)                         |
| SE0231                 | SERP2349           | <i>fosB</i>  | 2.4                      | ↑                      | Fosfomycin resistance protein                                               |
| <b>SE0253</b>          | <b>SERP2327</b>    |              | 6.4                      | ↑                      | Dihydrolipoamide dehydrogenase (EC 1.8.1.4); pyruvate dehydrogenase         |
| <b>SE0254</b>          | <b>SERP2326</b>    |              | 8.1                      | ↑                      | Acetoin dehydrogenase $\alpha$ subunit (EC 1.1.1.-); pyruvate dehydrogenase |
| <b>SE0255</b>          | <b>SERP2325</b>    |              | 7.3                      | ↑                      | Acetoin dehydrogenase $\beta$ subunit (EC 1.1.1.-); pyruvate dehydrogenase  |
| <b>SE0256</b>          | <b>SERP2324</b>    |              | 5.8                      | ↑                      | Dihydrolipoamide acetyltransferase (EC 2.3.1.2); pyruvate dehydrogenase     |
| <b>SE0284</b>          | <b>SERP0162</b>    | <i>ctsR</i>  | 3.2                      | ↑                      | Transcriptional regulator                                                   |
| <b>SE0285</b>          | <b>SERP0163</b>    |              | 3.2                      | ↑                      | UvrB/UvrC domain protein                                                    |
| <b>SE0286</b>          | <b>SERP0164</b>    |              | 3.1                      | ↑                      | ATP:guanido phosphotransferase, putative arginine/creatine kinase           |
| SE0376                 | SERP0258           |              | 2.4                      | ↑                      | Conserved hypothetical protein                                              |
| SE0400                 | SERP0284           | <i>snoD</i>  | 2.7                      | ↑                      | Complex 1 NADH oxidoreductase                                               |
| <b>SE0532</b>          | <b>SERP0417</b>    | <i>comF</i>  | 2.5                      | ↑                      | superfamily II DNA/RNA helicase ComF                                        |
| <b>SE0534</b>          | <b>SERP0419</b>    |              | 2.3                      | ↑                      | Ribosomal subunit interface protein; contains RaiA region.                  |
| SE0570                 | SERP0457           |              | 2.6                      | ↑                      | Conserved hypothetical protein                                              |
| SE0599                 | SERP0488           |              | 2.9                      | ↑                      | Thioredoxin                                                                 |
| SE0689                 | SERP0579           |              | 2.1                      | ↑                      | CoiA-like family competence protein                                         |
| SE0715                 | SERP0604           |              | 2.1                      | ↑                      | Putative RNA ligase                                                         |

|               |                 |             |     |   |                                                                    |
|---------------|-----------------|-------------|-----|---|--------------------------------------------------------------------|
| SE0784        | SERP0672        |             | 2.6 | ↑ | Cytochrome d ubiquinol oxidase, subunit 1 (EC 1.10.3-)             |
| SE0797        | SERP0686        | <i>potA</i> | 3.2 | ↑ | Spermidine/putrescine ABC transporter                              |
| SE0828        | SERP0719        |             | 6.1 | ↑ | Lipoprotein VsaC; potential collagen binding protein; YSIRK family |
| SE0840        | SERP0730        | <i>sdhC</i> | 4.0 | ↑ | Succinate dehydrogenase cytochrome b-558 (EC 1.3.99.1)             |
| <b>SE0850</b> | <b>SERP0740</b> |             | 2.1 | ↑ | Haloacid dehalogenase (HAD)-like hydrolases                        |
| <b>SE0851</b> | <b>SERP0741</b> |             | 2.3 | ↑ | Acetyltransferase; GNAT family                                     |
| SE0947        | SERP0837        | <i>rbFA</i> | 2.1 | ↑ | Ribosome binding factor A                                          |
| <b>SE0969</b> | <b>SERP0858</b> |             | 2.6 | ↑ | YmaC-like phage related replication protein                        |
| <b>SE0970</b> | <b>SERP0859</b> |             | 3.2 | ↑ | Conserved hypothetical protein                                     |
| SE1007        | SERP0894        |             | 4.8 | ↑ | Conserved hypothetical protein                                     |
| <b>SE1066</b> | <b>SERP0956</b> | <i>phoU</i> | 2.7 | ↑ | Phosphate transport protein                                        |
| <b>SE1069</b> | <b>SERP0959</b> | <i>pstC</i> | 2.1 | ↑ | Phosphate ABC transporter, permease protein                        |
| <b>SE1075</b> | <b>SERP0965</b> | <i>dapA</i> | 2.6 | ↑ | Dihydrodipicolinate synthase (EC 4.2.1.52)                         |
| <b>SE1076</b> | <b>SERP0966</b> | <i>dapB</i> | 2.6 | ↑ | Dihydrodipicolinate reductase (EC 1.3.1.26)                        |
| SE1097        | SERP0986        | <i>sucA</i> | 3.7 | ↑ | Oxoglutarate dehydrogenase (succinyl-transferring; EC 1.2.4.2)     |
| SE1154        | SERP1035        |             | 2.0 | ↑ | 3-dehydroquinase synthase; tryptophan synthesis (EC 4.2.3.4)       |
| SE1345        | SERP1234        | <i>hemC</i> | 2.0 | ↑ | Porphobilinogen deaminase; heme synthesis (EC 2.5.1.61)            |
| SE1419        | SERP1306        |             | 2.6 | ↑ | Conserved hypothetical protein                                     |
| SE1429        | SERP1316        | <i>fmtB</i> | 3.3 | ↑ | FmtB; LPXTG motif cell wall anchor protein                         |
| SE1437        | SERP1324        | <i>putA</i> | 4.4 | ↑ | Proline dehydrogenase (EC 1.5.99.8)                                |
| SE1459        | SERP1353        | <i>pckA</i> | 3.2 | ↑ | Phosphoenolpyruvate carboxykinase (EC 4.1.1.49)                    |
| SE1469        | SERP1367        |             | 4.8 | ↑ | Hypothetical protein                                               |
| SE1522        | SERP1377        |             | 2.4 | ↑ | Conserved hypothetical protein; putative membrane protein          |
| SE1532        | SERP1387        | <i>fumC</i> | 2.2 | ↑ | Fumarate hydratase (EC 4.2.1.2)                                    |
| SE1575        | SERP1428        |             | 2.7 | ↑ | Immunodominant antigen B                                           |
| SE1626        | SERP1480        |             | 3.7 | ↑ | Conserved hypothetical protein                                     |
| SE1712        | SERP1721        |             | 2.6 | ↑ | Phosphotyrosine protein phosphatase (EC 3.1.3.48)                  |
| <b>SE1841</b> | <b>SERP1850</b> | <i>moaA</i> | 2.8 | ↑ | Molybdenum cofactor biosynthesis protein A                         |
| <b>SE1842</b> | <b>SERP1851</b> | <i>mobA</i> | 2.6 | ↑ | Molybdopterin-guanine dinucleotide biosynthesis protein A          |
| <b>SE1843</b> | <b>SERP1852</b> | <i>moaD</i> | 2.6 | ↑ | Molybdopterin converting factor, subunit 1                         |
| <b>SE1844</b> | <b>SERP1852</b> | <i>moaE</i> | 2.3 | ↑ | Molybdopterin converting factor subunit 2                          |
| <b>SE1845</b> | <b>SERP1854</b> | <i>mobB</i> | 3.2 | ↑ | Molybdopterin-guanine dinucleotide biosynthesis protein B          |
| <b>SE1848</b> | <b>SERP1857</b> | <i>moaB</i> | 2.4 | ↑ | Molybdenum precursor biosynthesis/cofactor biosynthesis            |
| <b>SE1850</b> | <b>SERP1859</b> | <i>modC</i> | 2.7 | ↑ | Molybdenum transport ATP-binding protein ModC                      |

|               |                 |             |      |   |                                                           |
|---------------|-----------------|-------------|------|---|-----------------------------------------------------------|
| SE1859        | SERP1867        |             | 3.0  | ↑ | Conserved hypothetical protein                            |
| SE1906        | SERP1918        |             | 3.1  | ↑ | Amidohydrolase family protein                             |
| SE1919        | SERP1931        |             | 2.1  | ↑ | DNA 3-methyladenine glycosidase                           |
| SE1947        | SERP1959        | <i>tpgX</i> | 2.1  | ↑ | TpgX; putative lipoprotein                                |
| SE1960        | SERP1969        |             | 4.3  | ↑ | Putative Type II DNA modification enzyme                  |
| SE1962        | SERP1973        |             | 2.6  | ↑ | General stress protein 26                                 |
| SE2013        | SERP2026        | <i>IrgA</i> | 5.2  | ↑ | Holin/anti-holin system with CidA                         |
| SE2028        | SERP2041        | <i>gltB</i> | 2.8  | ↑ | Glutamate synthase                                        |
| SE2035        | SERP2048        | <i>argE</i> | 2.7  | ↑ | Acetyl-ornithine deacetylase (EC 3.5.1.16)                |
| <b>SE2044</b> | <b>SERP2057</b> | <i>gltP</i> | 4.3  | ↑ | Gluconate transporter - permease                          |
| <b>SE2045</b> | <b>SERP2058</b> | <i>gntK</i> | 5.6  | ↑ | Gluconokinase                                             |
| <b>SE2046</b> | <b>SERP2059</b> | <i>gntR</i> | 4.3  | ↑ | Gluconate operon transcriptional repressor                |
| <b>SE2048</b> | <b>SERP2061</b> |             | 2.5  | ↑ | Transcriptional regulator; MerR family                    |
| <b>SE2049</b> | <b>SERP2062</b> |             | 3.3  | ↑ | Conserved hypothetical protein                            |
| SE2063        | SERP2076        |             | 2.2  | ↑ | Fructose 1,6 bisphosphatase (EC 3.1.3.11)                 |
| SE2067        | SERP2080        |             | 4.3  | ↑ | Putative succinate semialdehyde dehydrogenase             |
| SE2071        | SERP2084        |             | 2.8  | ↑ | Aldehyde dehydrogenase (EC 1.2.1.3)                       |
| SE2074        | SERP2087        | <i>ddh</i>  | 6.4  | ↑ | D-lactate dehydrogenase (EC 1.1.1.28)                     |
| <b>SE2087</b> | <b>SERP2101</b> | <i>rbsD</i> | 3.6  | ↑ | High affinity ribose transport protein                    |
| <b>SE2088</b> | <b>SERP2102</b> | <i>rbsU</i> | 3.9  | ↑ | Ribose transporter                                        |
| <b>SE2113</b> | <b>SERP2125</b> |             | 3.0  | ↑ | Hypothetical protein                                      |
| <b>SE2115</b> | <b>SERP2127</b> | <i>feoA</i> | 3.0  | ↑ | Ferrous iron transport protein A                          |
| SE2131        | SERP2143        |             | 2.4  | ↑ | Fructosamine kinase family protein                        |
| SE2154        | SERP2165        |             | 5.9  | ↑ | Coenzyme A disulfide reductase                            |
| <b>SE2169</b> | <b>SERP2180</b> |             | 3.0  | ↑ | Anaerobic C4-dicarboxylate membrane transporter, putative |
| <b>SE2170</b> | <b>SERP2181</b> |             | 2.2  | ↑ | Anaerobic dicarboxylate transporter                       |
| <b>SE2173</b> | <b>SERP2184</b> |             | 6.1  | ↑ | Conserved hypothetical protein                            |
| <b>SE2174</b> | <b>SERP2185</b> |             | 2.2  | ↑ | Adenylylsulfate kinase                                    |
| <b>SE2194</b> | <b>SERP2205</b> |             | 3.9  | ↑ | Putative two component sensor histidine kinase            |
| <b>SE2195</b> | <b>SERP2206</b> |             | 2.5  | ↑ | Two component response regulator                          |
| SE2199        | SERP2210        |             | 2.8  | ↑ | Teichoic acid biosynthesis protein F                      |
| SE2218        | SERP2251        | <i>argR</i> | 10.3 | ↑ | Transcriptional regulator                                 |
| SE2220        | SERP2253        |             | 2.5  | ↑ | Succinyl-diaminopimelate desuccinylase (EC 3.5.1.8)       |
| SE2226        | SERP2258        |             | 2.9  | ↑ | Putative hemolysin                                        |

|               |                 |             |     |   |                                                                   |
|---------------|-----------------|-------------|-----|---|-------------------------------------------------------------------|
| SE2231        | SERP2263        |             | 2.3 | ↑ | Autolysin precursor                                               |
| SE2234        | SERP2267        |             | 2.8 | ↑ | Conserved hypothetical protein                                    |
| <b>SE2253</b> | <b>SERP2283</b> |             | 2.4 | ↑ | Phosphonate transport permease                                    |
| <b>SE2254</b> | <b>SERP2284</b> |             | 2.7 | ↑ | Phosphonate transport permease                                    |
| SE2390        | Not present     |             | 2.1 | ↑ | Conserved hypothetical protein                                    |
| SE2403        | SERP0018        | <i>geh</i>  | 5.7 | ↑ | Glycerol ester hydrolase                                          |
|               |                 |             |     |   |                                                                   |
| SE0168        | Not present     |             | 2.5 | ↓ | Galactosamine-containing minor teichoic acid biosynthesis protein |
| SE0354        | SERP0232        |             | 2.3 | ↓ | Cationic amino acid transporter                                   |
| SE0409        | SERP0294        |             | 5.2 | ↓ | Conserved hypothetical protein                                    |
| SE0454        | SERP0339        | <i>uppP</i> | 3.0 | ↓ | Undecaprenyl pyrophosphate phosphatase (EC 3.6.1.27)              |
| <b>SE0464</b> | <b>SERP0350</b> |             | 2.1 | ↓ | Conserved hypothetical protein                                    |
| <b>SE0465</b> | <b>SERP0351</b> |             | 2.8 | ↓ | Conserved hypothetical protein                                    |
| SE0555        | SERP0440        |             | 2.2 | ↓ | Hypothetical protein                                              |
| SE0577        | SERP0465        | <i>czcD</i> | 2.9 | ↓ | Cation-efflux system membrane protein CzcD                        |
| SE0583        | SERP0471        |             | 2.7 | ↓ | Conserved hypothetical protein                                    |
| SE0586        | SERP0475        |             | 2.7 | ↓ | Conserved hypothetical protein                                    |
| SE0590        | SERP0478        |             | 2.6 | ↓ | Truncated IS1272 transposase                                      |
| SE0605        | SERP0495        |             | 4.1 | ↓ | Conserved hypothetical protein                                    |
| SE0623        | SERP0517        |             | 2.1 | ↓ | Conserved hypothetical protein                                    |
| <b>SE0633</b> | <b>SERP0525</b> |             | 2.5 | ↓ | Conserved hypothetical protein                                    |
| <b>SE0634</b> | <b>SERP0526</b> |             | 2.2 | ↓ | HesB domain protein; iron sulfur assembly protein                 |
| SE0659        | SERP0551        |             | 2.6 | ↓ | Conserved hypothetical protein                                    |
| SE0680        | SERP0570        | <i>oppB</i> | 2.6 | ↓ | Oligopeptide transport system permease protein OppB               |
| <b>SE0734</b> | <b>SERP0620</b> |             | 2.7 | ↓ | Conserved hypothetical protein                                    |
| <b>SE0735</b> | <b>SERP0621</b> |             | 2.7 | ↓ | Conserved hypothetical protein                                    |
| <b>SE0736</b> | <b>SERP0622</b> |             | 2.0 | ↓ | Conserved hypothetical protein                                    |
| SE0889        | SERP0780        |             | 3.0 | ↓ | Conserved hypothetical protein                                    |
| SE0965        | SERP0854        |             | 3.2 | ↓ | Conserved hypothetical protein                                    |
| SE1064        | SERP0954        |             | 4.8 | ↓ | Conserved hypothetical protein                                    |
| SE1335        | SERP1216        |             | 6.4 | ↓ | Conserved hypothetical protein                                    |
| SE1419        | SERP1306        |             | 2.1 | ↓ | Conserved hypothetical protein                                    |
| SE1440        | SERP1327        | <i>ribE</i> | 3.2 | ↓ | Riboflavin synthase alpha chain (EC 2.5.1.9)                      |
| SE1441        | SERP1328        | <i>ribD</i> | 3.6 | ↓ | Riboflavin specific deaminase (EC 3.5.4.26)                       |

|               |                 |             |      |   |                                                                      |
|---------------|-----------------|-------------|------|---|----------------------------------------------------------------------|
| SE1526        | SERP1381        |             | 2.2  | ↓ | Putative conserved transcriptional regulator                         |
| SE1581        | SERP1434        |             | 3.7  | ↓ | conserved hypothetical protein                                       |
| <b>SE1770</b> | <b>SERP1779</b> |             | 2.4  | ↓ | Siderophore biosynthesis protein; lucA/lucC family                   |
| <b>SE1771</b> | <b>SERP1780</b> |             | 2.4  | ↓ | Putative transporter                                                 |
| SE1847        | SERP1856        | <i>moaC</i> | 2.9  | ↓ | Molybdenum cofactor biosynthesis protein C                           |
| SE2118        | SERP2130        |             | 9.0  | ↓ | Conserved hypothetical protein                                       |
| <b>SE2137</b> | <b>SERP2149</b> |             | 3.8  | ↓ | Hypothetical protein                                                 |
| <b>SE2138</b> | <b>SERP2149</b> |             | 5.6  | ↓ | Hypothetical protein                                                 |
| <b>SE2330</b> | <b>SERP0087</b> |             | 4.7  | ↓ | Conserved hypothetical protein                                       |
| <b>SE2331</b> | <b>SERP0086</b> |             | 13.7 | ↓ | Hypothetical protein                                                 |
| <b>SE2332</b> | <b>SERP0085</b> |             | 9.4  | ↓ | Conserved hypothetical protein                                       |
| <b>SE2333</b> | <b>SERP0084</b> |             | 13.0 | ↓ | NADH-quinone dehydrogenase subunit 5 (EC 1.6.5.3)                    |
| <b>SE2341</b> | <b>SERP0074</b> |             | 2.4  | ↓ | Conserved hypothetical protein                                       |
| <b>SE2342</b> | <b>SERP0073</b> |             | 2.0  | ↓ | Conserved hypothetical protein                                       |
| SE2354        | SERP0063        |             | 3.1  | ↓ | Amino acid/cation (Na <sup>+</sup> /H <sup>+</sup> ) symport protein |

<sup>1</sup>Genome locus tag of *S. epidermidis* ATCC12228. Note that locus tags in alternating bold red and bold font are genes that are predicted to be transcriptionally co-regulated.

<sup>2</sup>Genome locus tag of *S. epidermidis* RP62A. Note that locus tags in alternating bold and bold red font are genes that are predicted to be transcriptionally co-regulated.

<sup>3</sup>Fold change (either upregulated or downregulated) of a 72 hour *S. epidermidis* 1457 biofilm in comparison to a 24 hour biofilm

<sup>4</sup>“↑” signifies that a gene was upregulated; “↓” signifies that a gene was downregulated
